# Supplementary material
Source: publisher figshare collection journal article supplement (https://f1000.figshare.com/ndownloader/files/1098093)
Supplement: Supplementary file 1 [file 1098093]

Complex	Proteins	n	m	Edge Density	Max Degree	Min Degree	Mean Degree	Degree Deviation	Clustering Coefficient	Average MCC	MCC Deviation	Max Between	Min Between	Ave Between	Between Deviation	Edge Connectivity	Vertex Connectivity
'90.10'	3	3	2	0.666666667	2	1	1.333333333	0.471404521	0	1	0	1	0	0.333333333	0.471404521	1	1
'110'	4	4	4	0.666666667	3	1	2	0.707106781	0.6	1	0	2	0	0.5	0.866025404	1	1
133.20'	6	6	5	0.333333333	5	1	1.666666667	1.490711985	0	1	0	10	0	1.666666667	3.726779963	1	1
'140.30.30.30'	3	3	3	1	2	2	2	0	1	1	0	0	0	0	0	2	2
'260.20.10'	4	4	3	0.5	2	1	1.5	0.5	0	0.5	0.5	2	0	1	1	1	1
'260.70'	3	3	2	0.666666667	2	1	1.333333333	0.471404521	0	1	0	1	0	0.333333333	0.471404521	1	1
'270.20.10'	3	3	3	1	2	2	2	0	1	1	0	0	0	0	0	2	2
'270.20.20'	3	3	2	0.666666667	2	1	1.333333333	0.471404521	0	1	0	1	0	0.333333333	0.471404521	1	1
'270.20.30'	9	9	26	0.722222222	7	2	5.777777778	1.617802198	0.816176471	0.899537037	0.190048975	3.771428571	0	1.222222222	1.17142427	2	2
'270.20.40'	4	4	6	1	3	3	3	0	1	1	0	0	0	0	0	3	3
'300'	3	3	3	1	2	2	2	0	1	1	0	0	0	0	0	2	2
'410.10'	6	6	9	0.6	4	1	3	1	0.714285714	0.738095238	0.354753915	4	0	1.333333333	1.490711985	1	1
'410.20'	8	8	15	0.535714286	5	1	3.75	1.479019946	0.72	0.703703704	0.370833044	6	0	2.375	2.10282548	1	1
'410.33'	4	3	2	0.666666667	2	1	1.333333333	0.471404521	0	1	0	1	0	0.333333333	0.471404521	1	1
'410.40.90'	3	2	1	1	1	1	1	0	N/A	N/A	N/A	0	0	0	0	1	1
'410.40.100'	3	3	2	0.666666667	2	1	1.333333333	0.471404521	0	1	0	1	0	0.333333333	0.471404521	1	1
'440.10.10'	5	5	6	0.6	3	1	2.4	0.8	0.6	0.777777778	0.342467445	3	0	1	1.095445115	1	1
'440.12.20'	9	8	14	0.5	6	1	3.5	1.5	0.545454545	0.75	0.334104047	6.333333333	0	2.125	2.466089459	1	1
'440.12.30'	3	3	3	1	2	2	2	0	1	1	0	0	0	0	0	2	2
'440.14.10'	10	9	16	0.444444444	7	1	3.555555556	1.770819717	0.490909091	0.745238095	0.340950386	10	0	2.666666667	3.48187547	1	1
'450'	6	6	5	0.333333333	5	1	1.666666667	1.490711985	0	1	0	10	0	1.666666667	3.726779963	1	1
'470.10'	6	6	9	0.6	5	2	3	1.154700538	0.545454545	0.9	0.2	4	0	1	1.443375673	2	2
'470.20'	5	5	8	0.8	4	3	3.2	0.4	0.666666667	0.8	0.244948974	0.666666667	0.333333333	0.4	0.133333333	3	3
'470.30.10'	3	3	2	0.666666667	2	1	1.333333333	0.471404521	0	1	0	1	0	0.333333333	0.471404521	1	1
'480.10.05'	3	3	3	1	2	2	2	0	1	1	0	0	0	0	0	2	2
'510.20'	4	4	3	0.5	3	1	1.5	0.866025404	0	1	0	3	0	0.75	1.299038106	1	1
'510.70.20'	12	12	11	0.166666667	6	1	1.833333333	1.343709625	0	0.3	0.439696865	40	0	12.5	14.16862732	1	1
'510.180.30.30'	3	3	2	0.666666667	2	1	1.333333333	0.471404521	0	1	0	1	0	0.333333333	0.471404521	1	1
'510.180.50.10'	3	3	2	0.666666667	2	1	1.333333333	0.471404521	0	1	0	1	0	0.333333333	0.471404521	1	1
'510.180.20'	5	5	5	0.5	4	1	2	1.095445115	0.375	1	0	5	0	1	2	1	1
'510.190.40'	5	5	5	0.5	3	1	2	0.632455532	0	0.444444444	0.496903995	3.5	0	1.2	1.208304597	1	1
'510.190.80'	3	3	2	0.666666667	2	1	1.333333333	0.471404521	0	1	0	1	0	0.333333333	0.471404521	1	1
'510.190.120'	4	4	5	0.833333333	3	2	2.5	0.5	0.75	1	0	0.5	0	0.25	0.25	2	2
'510.190.160.10'	3	3	3	1	2	2	2	0	1	1	0	0	0	0	0	2	2
'510.190.160.20'	3	3	2	0.666666667	2	1	1.333333333	0.471404521	0	1	0	1	0	0.333333333	0.471404521	1	1
'510.190.160.30'	3	3	2	0.666666667	2	1	1.333333333	0.471404521	0	1	0	1	0	0.333333333	0.471404521	1	1
'520.10.20'	4	4	4	0.666666667	3	1	2	0.707106781	0.6	1	0	2	0	0.5	0.866025404	1	1
'520.20'	9	9	19	0.527777778	8	2	4.222222222	1.749779528	0.44	0.777777778	0.283278862	8.783333333	0	1.888888889	2.701736981	2	2
'520.30'	3	2	1	1	1	1	1	0	N/A	N/A	N/A	0	0	0	0	1	1
